# Supplementary material for: Comparison of 1-Year Health Care Costs and Use Associated With Open vs Robotic-Assisted Radical Prostatectomy
Source: PubMed Central journal article supplement (PMC7985723; doi:10.1001/jamanetworkopen.2021.2265), 2021-03-22
Supplement: jamanetwopen-e212265-s001.pdf [file jamanetwopen-e212265-s001.pdf]

## Supplementary Online Content

Okhawere KE, Shih I-F, Lee S-H, Li Y, Wong JA, Badani KK. Comparison of 1-year health care costs and use associated with open vs robotic-assisted radical prostatectomy. *JAMA Netw Open*. 2021;4(3):e212265. doi:10.1001/jamanetworkopen.2021.2265

**eTable 1.** Diagnosis and Procedure Codes Used to Determine Eligibility

**eTable 2.** Breakdown of Outpatient Services Costs

**eTable 3.** Unadjusted costs Between Surgical Modalities

**eTable 4.** Adjusted Costs Between Surgical Modalities: Sensitivity Analysis Including Cases With Outlier Costs

**eFigure.** Time Series Graphics for the IPTW-Adjusted Payment

This supplementary material has been provided by the authors to give readers additional information about their work.

eTable 1. Diagnosis and Procedure Codes Used to Determine Eligibility

|                  |                                                                                                                               |
|------------------|-------------------------------------------------------------------------------------------------------------------------------|
| <b>Diagnosis</b> | -                                                                                                                             |
| <i>ICD-9</i>     |                                                                                                                               |
| 185              | Malignant neoplasm of prostate                                                                                                |
| <i>ICD-10</i>    |                                                                                                                               |
| C61              | Malignant neoplasm of prostate                                                                                                |
| <b>Procedure</b> |                                                                                                                               |
| <i>ICD-9</i>     |                                                                                                                               |
| 60.5             | Radical prostatectomy                                                                                                         |
| <i>ICD-10</i>    |                                                                                                                               |
| 0VT00ZZ          | Resection of prostate, open approach                                                                                          |
| 0VT04ZZ          | Resection of prostate, percutaneous endoscopic approach                                                                       |
| <b>Robotic</b>   |                                                                                                                               |
| <i>ICD-9</i>     |                                                                                                                               |
| 17.41            | Open robotic assisted procedure                                                                                               |
| 17.42            | Laparoscopic robotic assisted procedure                                                                                       |
| 17.43            | Percutaneous robotic assisted procedure                                                                                       |
| 17.44            | Endoscopic robotic assisted procedure                                                                                         |
| 17.45            | Thoracoscopic robotic assisted procedure                                                                                      |
| 17.49            | Other and unspecified robotic assisted procedure                                                                              |
| <i>ICD-10</i>    |                                                                                                                               |
| 8E0W0CZ          | Robotic assisted procedure of trunk region, open approach                                                                     |
| 8E0W3CZ          | Robotic assisted procedure of trunk region, percutaneous approach                                                             |
| 8E0W4CZ          | Robotic assisted procedure of trunk region, percutaneous endoscopic approach                                                  |
| 8E0W7CZ          | Robotic assisted procedure of trunk region, via natural or artificial opening                                                 |
| 8E0W8CZ          | Robotic assisted procedure of trunk region, via natural or artificial opening endoscopic                                      |
| 8E0WXCZ          | Robotic assisted procedure of trunk region                                                                                    |
| <b>CPT/HCPCS</b> |                                                                                                                               |
| 55866            | Laparoscopy, surgical prostatectomy, retropubic radical, including nerve sparing, includes robotic assistance, when performed |
| S2900            | Surgical techniques requiring use of robotic surgical system (list separately in addition to code for primary procedure)      |

eTable 2. Breakdown of outpatient services costs

|                                          | All<br>(n=11457)<br>Mean | ORP<br>(n=1604)<br>Mean | RARP<br>(n=9853)<br>Mean | ORP as<br>reference<br>Mean Diff |
|------------------------------------------|--------------------------|-------------------------|--------------------------|----------------------------------|
| Radiology OP Therapeutic Radiology       | \$5,861                  | \$7,887                 | \$5,531                  | \$-2,356                         |
| Facility OP Procedures                   | \$1,711                  | \$1,851                 | \$1,689                  | \$-162                           |
| Facility OP ER                           | \$553                    | \$685                   | \$532                    | \$-153                           |
| Physician Specialty OP Office Visits     | \$496                    | \$518                   | \$493                    | \$-25                            |
| Physician Specialty OP Procedures        | \$491                    | \$535                   | \$484                    | \$-52                            |
| Radiology OP CT Scans                    | \$348                    | \$530                   | \$318                    | \$-212                           |
| Facility OP Specialty Drugs              | \$342                    | \$425                   | \$329                    | \$-96                            |
| Professional OP Specialty Drugs          | \$336                    | \$287                   | \$344                    | \$57                             |
| Laboratory OP Chemistry Tests            | \$302                    | \$354                   | \$293                    | \$-60                            |
| Physician Non-Specialty OP Office Visits | \$301                    | \$323                   | \$298                    | \$-25                            |

ORP, open radical prostatectomy; RARP, robotic-assisted radical prostatectomy; Diff, difference; OP, outpatient; ER, emergency room.

eTable 3. Unadjusted costs between surgical modalities

|                                 | ORP   |             | RARP  |             | Diff |           | P-value |
|---------------------------------|-------|-------------|-------|-------------|------|-----------|---------|
|                                 | Mean  | 95% CI      | Mean  | 95% CI      | Mean | 95% CI    |         |
| Index surgery                   | 23924 | 23431-24426 | 26554 | 26332-26778 | 2630 | 2085-3175 | <.0001  |
| Index to 30-day post-discharge  | 25657 | 25109-26216 | 28371 | 28125-28619 | 2715 | 2108-3320 | <.0001  |
| Index to 90-day post-discharge  | 28696 | 28043-29364 | 30594 | 30312-30880 | 1898 | 1180-2617 | <.0001  |
| Index to 180-day post-discharge | 35445 | 34505-36411 | 35730 | 35344-36120 | 285  | -744-1314 | 0.59    |
| Index to 270-day post-discharge | 41225 | 40024-42463 | 40754 | 40271-41244 | -471 | -1784-842 | 0.48    |
| Index to 365-day post-discharge | 45925 | 44524-47370 | 45095 | 44535-45662 | -830 | -2361-700 | 0.29    |

ORP, open radical prostatectomy; RARP, robotic-assisted radical prostatectomy; Diff, difference

eTable 4. Adjusted costs between surgical modalities: sensitivity analysis including cases with outlier costs

|                                 | ORP   |             | RARP  |             | Diff |            | P-value |
|---------------------------------|-------|-------------|-------|-------------|------|------------|---------|
|                                 | Mean  | 95% CI      | Mean  | 95% CI      | Mean | 95% CI     |         |
| Index surgery                   | 24497 | 23938-25068 | 26881 | 26633-27132 | 2385 | 1767-3002  | <.0001  |
| Index to 30-day post-discharge  | 26048 | 25441-26670 | 28649 | 28379-28923 | 2601 | 1928-3273  | <.0001  |
| Index to 90-day post-discharge  | 28704 | 28015-29410 | 30745 | 30446-31047 | 2041 | 1281-2800  | <.0001  |
| Index to 180-day post-discharge | 35212 | 34262-36188 | 35710 | 35319-36105 | 498  | -542-1538  | 0.35    |
| Index to 270-day post-discharge | 40710 | 39529-41928 | 40473 | 39997-40956 | -237 | -1529-1054 | 0.72    |
| Index to 365-day post-discharge | 44868 | 43525-46253 | 44617 | 44075-45166 | -252 | -1720-1217 | 0.74    |

ORP, open radical prostatectomy; RARP, robotic-assisted radical prostatectomy; Diff, difference

## 2-year Adjusted Mean Health Care Cost after Radical Prostatectomy

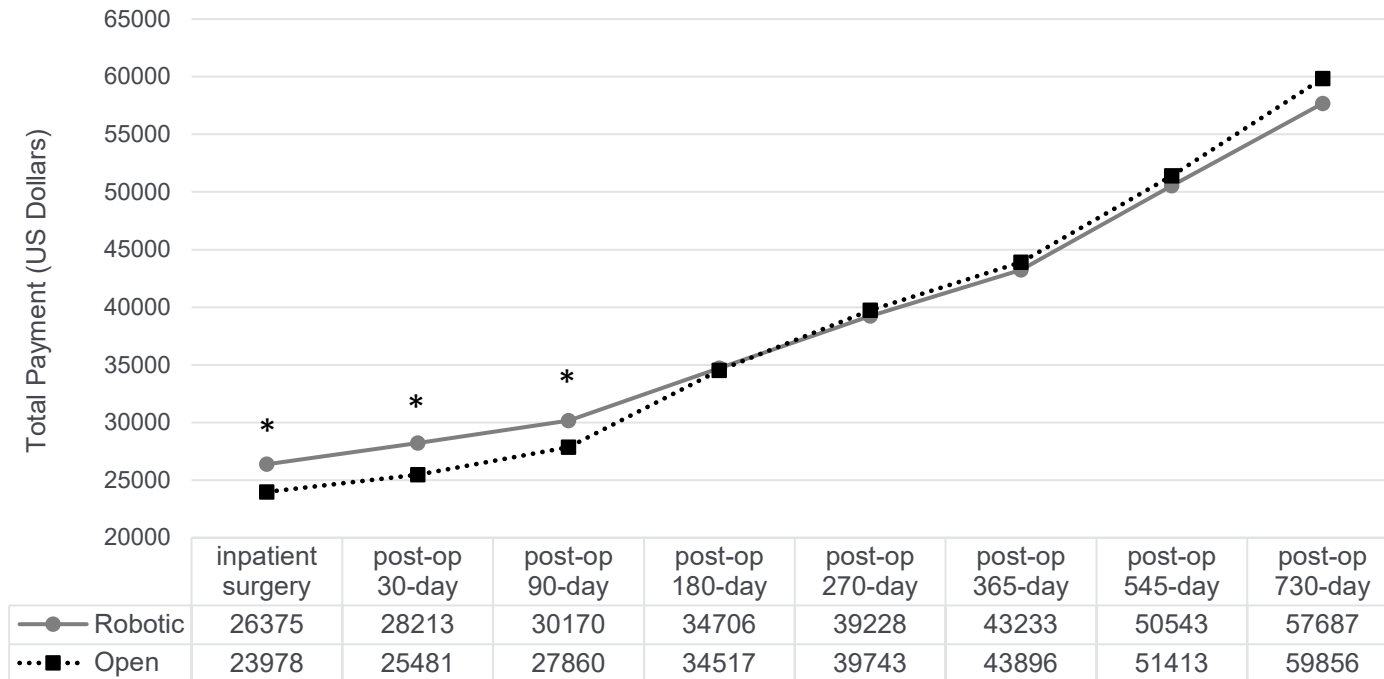

eFigure. Time series graphics for the IPTW-adjusted payment. Total payment was calculated by adding facility and professional payments during the inpatient stay (index surgery) and all health services related payments within the 2-year after discharge, including inpatient, outpatient, and prescription drug claims cumulatively among patients who had 2-year insurance enrollment. \*  $p < 0.05$
